# Supplementary material
Source: Springer Nature journal article supplement (https://www.springermedizin.de/resource/supplementary/13618_2013_84_MOESM2_ESM.pdf/9681124)

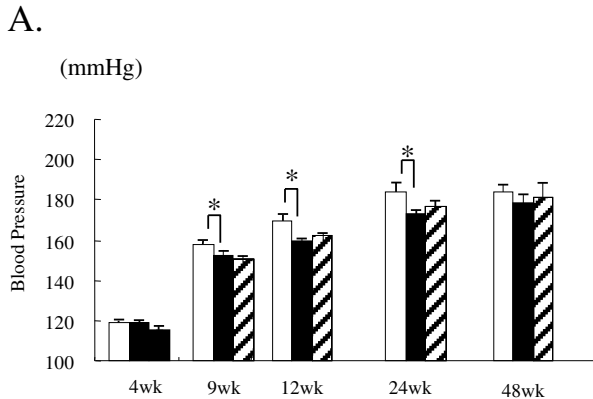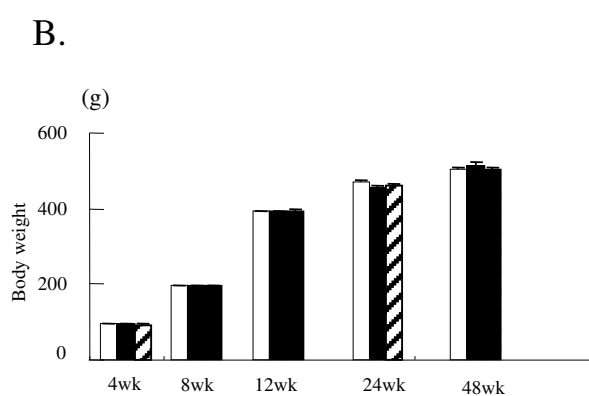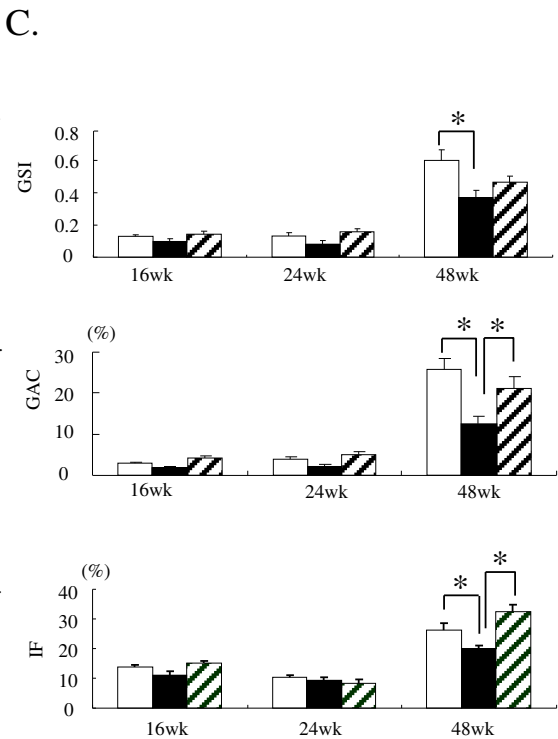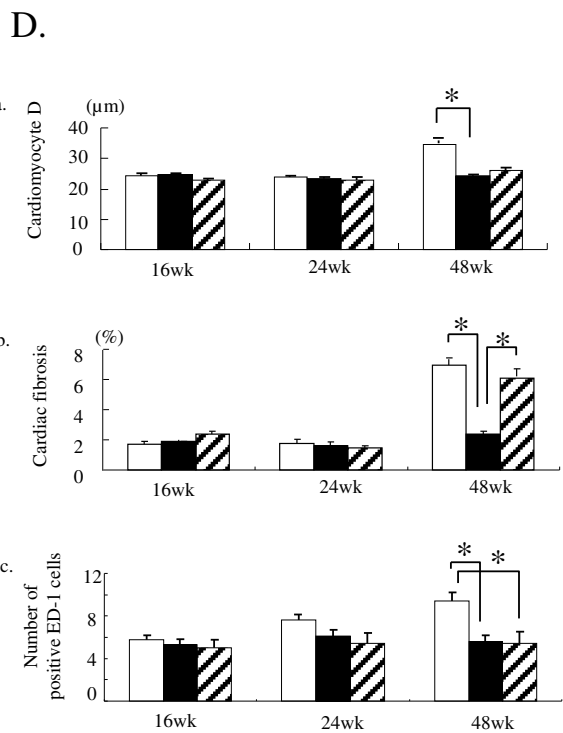

Supplement: MOESM2 [file 9681124]
